# Supplementary material
Source: PubMed Central journal article supplement (PMC4662182)
Supplement: EXCLI-12-733-s-001.pdf [file EXCLI-12-733-s-001.pdf]

**SUPPLEMENTARY MATERIAL to**

**PULMONARY PHTHALATE EXPOSURE AND ASTHMA –  
 IS PPAR A PLAUSIBLE MECHANISTIC LINK?**

Anette Kocbach Bølling<sup>1\*</sup>, Jørn A Holme<sup>1</sup>, Carl Gustaf Bornehag<sup>2</sup>, Unni C Nygaard<sup>1</sup>,  
 Randi J Bertelsen<sup>1</sup>, Eewa Nånberg<sup>2</sup>, Johanna Bodin<sup>1</sup>, Amrit Kaur Sakhi<sup>1</sup>, Cathrine Thomsen<sup>1</sup>, Rune Becher<sup>1</sup>

<sup>1</sup> Division of Environmental Medicine, Norwegian Institute of Public Health, PO Box 4404 Nydalen, N-0403 Oslo, Norway

<sup>2</sup> University of Karlstad, 651-88, Karlstad, Sweden

*Phthlate-induced activation of PPARs in transfection studies – complete tables*

**Table A1-3. Phthlate-induced activation of PPARs in transfection studies.** Summary of the reported EC<sub>50</sub> values, the range of concentrations that caused significant PPAR activation and the corresponding range of fold increase in PPAR activation for a selection of monophthalates. If references only reported lowest activation concentration or only the maximum fold increase, these values are listed. The shaded rows represent the summary of the ranges reported in the literature for each phthalate, whereas the other rows show data reported in the literature with the appropriate reference. The data in the shaded rows is equivalent to the data presented in Table 3 in the main manuscript.  
 - : no activation observed for the highest tested concentration

**Table A1: PPARα**

| Phthalate monoester | human PPARα           |                                                                                                                                                   |                                                                                                                                     | mouse PPARα                                                                |                                                                                                                                                                                                  |                                                                                                                                                                                            |
|---------------------|-----------------------|---------------------------------------------------------------------------------------------------------------------------------------------------|-------------------------------------------------------------------------------------------------------------------------------------|----------------------------------------------------------------------------|--------------------------------------------------------------------------------------------------------------------------------------------------------------------------------------------------|--------------------------------------------------------------------------------------------------------------------------------------------------------------------------------------------|
|                     | EC <sub>50</sub> (μM) | Range/<br>Lowest act.<br>conc. (μM)                                                                                                               | Fold<br>increase                                                                                                                    | EC <sub>50</sub> (μM)                                                      | Range/<br>Lowest act.<br>conc. (μM)                                                                                                                                                              | Fold<br>increase                                                                                                                                                                           |
| MMP                 | - <sup>b</sup>        | No act.                                                                                                                                           |                                                                                                                                     | - <sup>c</sup>                                                             | No act.                                                                                                                                                                                          | 2 <sup>b</sup>                                                                                                                                                                             |
| MEP                 | -                     | No act.                                                                                                                                           |                                                                                                                                     | - <sup>c</sup><br>- <sup>g</sup>                                           | No act.                                                                                                                                                                                          |                                                                                                                                                                                            |
| MsecBP              | - <sup>b</sup>        | No act.                                                                                                                                           |                                                                                                                                     | 63 <sup>b</sup>                                                            | 10<br>10-300 <sup>b</sup>                                                                                                                                                                        | 1.5-3<br>~1.5-3 <sup>b</sup>                                                                                                                                                               |
| MnBP                | - <sup>b</sup>        | 10-200                                                                                                                                            | 0.5-2                                                                                                                               | - <sup>b</sup>                                                             | 100                                                                                                                                                                                              | 4                                                                                                                                                                                          |
| MBzP                |                       | 10-100 <sup>d</sup><br>200 <sup>g</sup>                                                                                                           | ~0.5-0.7 <sup>d</sup><br>2.4 <sup>g</sup>                                                                                           |                                                                            | 100 <sup>g</sup>                                                                                                                                                                                 | 3.7 <sup>g</sup>                                                                                                                                                                           |
| MEHP                | 3.2 <sup>b</sup>      | 30-300<br>30-300 <sup>b</sup><br>200 <sup>g</sup><br>3-100<br>5-20 <sup>a</sup><br>4-50 <sup>b</sup><br>125-750 <sup>c*</sup><br>100 <sup>d</sup> | 2-3<br>~1.8-2.8 <sup>b</sup><br>2.5<br>2-4<br>3.4-4.2 <sup>a</sup><br>~1.8-2.2 <sup>b</sup><br>~3 <sup>c</sup><br>~1.5 <sup>d</sup> | 21 <sup>b</sup><br>125 <sup>c</sup><br>0.6 <sup>b</sup><br>40 <sup>c</sup> | 10-100<br>10-400 <sup>b</sup><br>100 <sup>g</sup><br>0.5-40<br>5-20 <sup>a</sup><br>0.5-20 <sup>b</sup><br>63-750 <sup>c*</sup><br>3.2-200 <sup>e</sup><br>1-100 <sup>f</sup><br>10 <sup>g</sup> | 2-12<br>~2-5 <sup>b</sup><br>12.3 <sup>g</sup><br>2-7<br>2.7-3.1 <sup>a</sup><br>~1.9-2.2 <sup>b</sup><br>~2-7 <sup>c</sup><br>~2-3 <sup>e</sup><br>~2-4 <sup>f</sup><br>11.1 <sup>g</sup> |
| MnOP                |                       | 30 <sup>g</sup><br>10<br>10 <sup>g</sup>                                                                                                          | 4.8 <sup>g</sup><br>8<br>8                                                                                                          |                                                                            | 10 <sup>g</sup><br>10<br>10 <sup>g</sup>                                                                                                                                                         | 32<br>32 <sup>g</sup>                                                                                                                                                                      |
| MiNP                |                       | 10<br>10 <sup>g</sup>                                                                                                                             | 6<br>6 <sup>g</sup>                                                                                                                 |                                                                            | 3<br>3 <sup>g</sup>                                                                                                                                                                              | 27<br>27 <sup>g</sup>                                                                                                                                                                      |
| MiDP                |                       | 30<br>30 <sup>g</sup>                                                                                                                             | 4<br>4 <sup>g</sup>                                                                                                                 |                                                                            | 3<br>3 <sup>g</sup>                                                                                                                                                                              | 27<br>27 <sup>g</sup>                                                                                                                                                                      |

**Table A2: PPAR $\gamma$**

| Phthalate monoester | human PPAR $\gamma$                                     |                                                                                                                                  |                                                                                                                                           | mouse PPAR $\gamma$                  |                                                                                                                                                               |                                                                                                                                                               |
|---------------------|---------------------------------------------------------|----------------------------------------------------------------------------------------------------------------------------------|-------------------------------------------------------------------------------------------------------------------------------------------|--------------------------------------|---------------------------------------------------------------------------------------------------------------------------------------------------------------|---------------------------------------------------------------------------------------------------------------------------------------------------------------|
|                     | EC <sub>50</sub><br>( $\mu$ M)                          | Range/<br>Lowest<br>act. conc.<br>( $\mu$ M)                                                                                     | Fold<br>increase                                                                                                                          | EC <sub>50</sub><br>( $\mu$ M)       | Range/<br>Lowest act.<br>conc. ( $\mu$ M)                                                                                                                     | Fold<br>increase                                                                                                                                              |
| MMP                 | - <sup>b</sup>                                          | No act.                                                                                                                          |                                                                                                                                           | - <sup>b</sup><br>- <sup>c</sup>     | No act.                                                                                                                                                       |                                                                                                                                                               |
| MEP                 | - <sup>g</sup>                                          | No act.                                                                                                                          |                                                                                                                                           | - <sup>c</sup><br>- <sup>g</sup>     | No act.                                                                                                                                                       |                                                                                                                                                               |
| MsecBP              | - <sup>b</sup>                                          | No act.                                                                                                                          |                                                                                                                                           |                                      | 300<br>300 <sup>b</sup>                                                                                                                                       | 2<br>~2 <sup>b</sup>                                                                                                                                          |
| MnBP                | - <sup>b</sup><br>- <sup>d</sup><br>- <sup>g</sup>      | No act.                                                                                                                          |                                                                                                                                           | - <sup>b</sup><br>- <sup>g</sup>     | No act.                                                                                                                                                       |                                                                                                                                                               |
| MBzP                | 100 <sup>b</sup>                                        | 30-200<br>30-300 <sup>b</sup>                                                                                                    | 2-4<br>~1.5-4 <sup>b</sup>                                                                                                                | 75 <sup>b</sup><br>100 <sup>c</sup>  | 10-100<br>10-300 <sup>b</sup>                                                                                                                                 | 2-8<br>~1.5-4 <sup>b</sup>                                                                                                                                    |
| MEHP                | 6.2 <sup>b</sup><br>4.9 <sup>d</sup><br>30 <sup>e</sup> | 200 <sup>g</sup><br>0.1-10<br>1-100 <sup>a</sup><br>5-60<br>63-750 <sup>c*</sup><br>0.1-100 <sup>d</sup><br>3.2-200 <sup>e</sup> | 4.2 <sup>g</sup><br>1.5-10<br>1.3-3.2 <sup>a</sup><br>~2-3 <sup>b</sup><br>~2-7 <sup>c</sup><br>~2-10 <sup>d</sup><br>~2-2.5 <sup>e</sup> | 10.1 <sup>b</sup><br>30 <sup>c</sup> | 100 <sup>g</sup><br>3-30<br>5-100 <sup>a</sup><br>3-50 <sup>b</sup><br>63-750 <sup>c*</sup><br>3.2-200 <sup>e</sup><br>25-250 <sup>t</sup><br>30 <sup>g</sup> | 7.8 <sup>g</sup><br>1.5-7<br>1.8-3.7 <sup>a</sup><br>~1.5-4 <sup>b</sup><br>~2-7 <sup>c</sup><br>~1.5-2 <sup>e</sup><br>~3-4 <sup>t</sup><br>2.5 <sup>g</sup> |
| MnOP                |                                                         | 100<br>100 <sup>g</sup>                                                                                                          | 19<br>19 <sup>g</sup>                                                                                                                     |                                      | 10<br>10 <sup>g</sup>                                                                                                                                         | 11<br>11 <sup>g</sup>                                                                                                                                         |
| MiNP                |                                                         | 30<br>30 <sup>g</sup>                                                                                                            | 9<br>9 <sup>g</sup>                                                                                                                       |                                      | 3<br>3 <sup>g</sup>                                                                                                                                           | 14<br>14 <sup>g</sup>                                                                                                                                         |
| MiDP                |                                                         | 3<br>3 <sup>g</sup>                                                                                                              | 8<br>8 <sup>g</sup>                                                                                                                       |                                      | 30<br>30 <sup>g</sup>                                                                                                                                         | 4<br>4 <sup>g</sup>                                                                                                                                           |

**Table A3: PPAR $\delta/\beta$**

| Phthalate monoester | human PPAR $\delta/\beta$      |                                              |                   | mouse PPAR $\delta/\beta$      |                                              |                       |
|---------------------|--------------------------------|----------------------------------------------|-------------------|--------------------------------|----------------------------------------------|-----------------------|
|                     | EC <sub>50</sub><br>( $\mu$ M) | Range/<br>Lowest<br>act. conc.<br>( $\mu$ M) | Fold<br>increase  | EC <sub>50</sub><br>( $\mu$ M) | Range/<br>Lowest<br>act. conc.<br>( $\mu$ M) | Fold<br>increase      |
| MMP                 |                                | No act.                                      |                   | No act.                        |                                              |                       |
|                     |                                |                                              |                   | - <sup>c</sup>                 |                                              |                       |
| MEP                 |                                | No act.                                      |                   | No act.                        |                                              |                       |
|                     |                                |                                              |                   | - <sup>c</sup>                 |                                              |                       |
|                     | - <sup>g</sup>                 |                                              |                   | - <sup>g</sup>                 |                                              |                       |
| MnBP                |                                | No act.                                      |                   |                                | 0.1-3                                        | 0.5-5                 |
|                     |                                |                                              |                   | 125 <sup>c</sup>               |                                              |                       |
|                     | - <sup>d</sup>                 |                                              |                   |                                | 0.1-100 <sup>d</sup>                         | ~0.8-0.5 <sup>d</sup> |
|                     | - <sup>g</sup>                 |                                              |                   |                                | 3 <sup>g</sup>                               | 4.7 <sup>g</sup>      |
| MBzP                |                                | No act.                                      |                   |                                | 100                                          | 11                    |
|                     | - <sup>g</sup>                 |                                              |                   |                                | 100 <sup>g</sup>                             | 10.8 <sup>g</sup>     |
| MEHP                |                                | 60                                           | 3-6               |                                | 0.1-200                                      | 0.6-17                |
|                     |                                | 63-750 <sup>c</sup>                          | ~3-6 <sup>c</sup> | 200 <sup>c</sup>               | 250-750 <sup>c</sup>                         | ~3 <sup>c</sup>       |
|                     | - <sup>d</sup>                 |                                              |                   |                                | 0.1-10 <sup>d</sup>                          | ~0.9-0.6 <sup>d</sup> |
|                     |                                |                                              |                   |                                | 3.2-200 <sup>e</sup>                         | ~ 1.5-4 <sup>e</sup>  |
|                     |                                |                                              |                   |                                | 25-250 <sup>f</sup>                          | ~ 3-4 <sup>f</sup>    |
|                     | - <sup>g</sup>                 |                                              |                   |                                | 200 <sup>g</sup>                             | 16.8 <sup>g</sup>     |
| MnOP                |                                | No act.                                      |                   |                                | 100                                          | 13                    |
|                     | - <sup>g</sup>                 |                                              |                   |                                | 100 <sup>g</sup>                             | 13 <sup>g</sup>       |
| MiNP                |                                | No act.                                      |                   |                                |                                              | 3                     |
|                     | - <sup>g</sup>                 |                                              |                   |                                |                                              | 3 <sup>g</sup>        |
| MiDP                |                                | No act.                                      |                   |                                | 100                                          | 8                     |
|                     | - <sup>g</sup>                 |                                              |                   |                                | 100 <sup>g</sup>                             | 8 <sup>g</sup>        |

- <sup>a</sup> Maloney and Waxman (1999) (transfection of Cos-1 cells with PPAR expression plasmids and a PPRE-firefly luciferase reporter)
- <sup>b</sup> Hurst and Waxman (2003) Mouse/human PPAR (transfection of Cos-1 cells with PPAR expression plasmids and a PPRE-firefly luciferase reporter)
- <sup>c</sup> Lampen et al: (2003) (monophthalate esters activation of PPAR–ligand binding domain in transfected ovary reporter cells)
- <sup>d</sup> Gopisetty Venkata et al. (2006) (trans-activation of human PPARs in a transfected breast cell line MCF-7)
- <sup>e</sup> Feige et al: (2007) (transient transfection of Cos-7, C2C12 and HeLa cells with a PPRE-firefly luciferase reporter construct, a normalisation vector encoding Renilla luciferase and an expression vector coding for various PPARs/empty)
- <sup>f</sup> Lapinskas et al. (2005) (trans-activation of mouse PPARs in a transfected liver cell line HepG2)
- <sup>g</sup> Bility et al. (2004) (trans-activation of mouse and human PPARs in a transfected mouse fibroblast cell line 3T3-L1)
- \* These lowest activation range data were excluded from the summary range presented in the table in the main manuscript. For the mouse PPARs the range of concentrations was higher than the EC50 level reported in the same study, whereas for the human PPARs, the range of concentrations did not include sufficiently low concentrations.
